# Supplementary material for: Au@Pd@Pt core–shell nanoparticles with mesoporous structures and nanocavities for enhanced electrocatalytic performance
Source: Royal Society of Chemistry journal article supplement (doi:10.1039/d5ce00960j), 2025-12-02
Supplement: d5ce00960j1.pdf [file d5ce00960j1.pdf]

## Supplementary information

### **Au@Pd@Pt Core-Shell Nanoparticles with Mesoporous Structures and Nanocavities for Enhanced Electrocatalytic Performance**

Hanchi Ma, Hao Wang, Xiya Yan, Bin Liu\* and Jianhui Yang\*

Key Laboratory of Synthetic and Natural Functional Molecule of the Ministry of Education, Shaanxi  
Key Laboratory of Physico-Inorganic Chemistry, College of Chemistry and Materials Science,  
Northwest University, Xi'an 710127, P.R. China.

\*Corresponding authors.

*E-mail address:* liubin@nwu.edu.cn (B. Liu), jianhui@nwu.edu.cn (J. Yang).

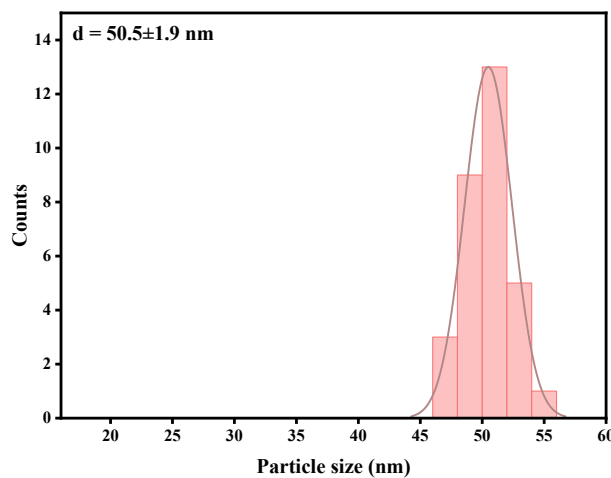

**Fig. S1** Size distribution of the synthesized Au@Pd@Pt CSNs.

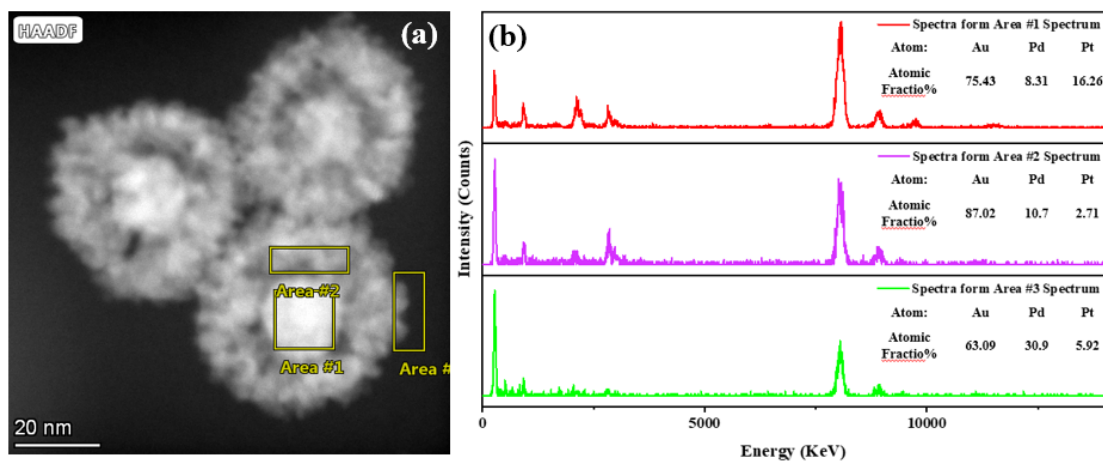

**Fig. S2 (a)** HAADF-STEM image and **(b)** the atomic fractions of Au, Pd, and Pt across the three designated regions in the Au@Pd@Pt CSN.

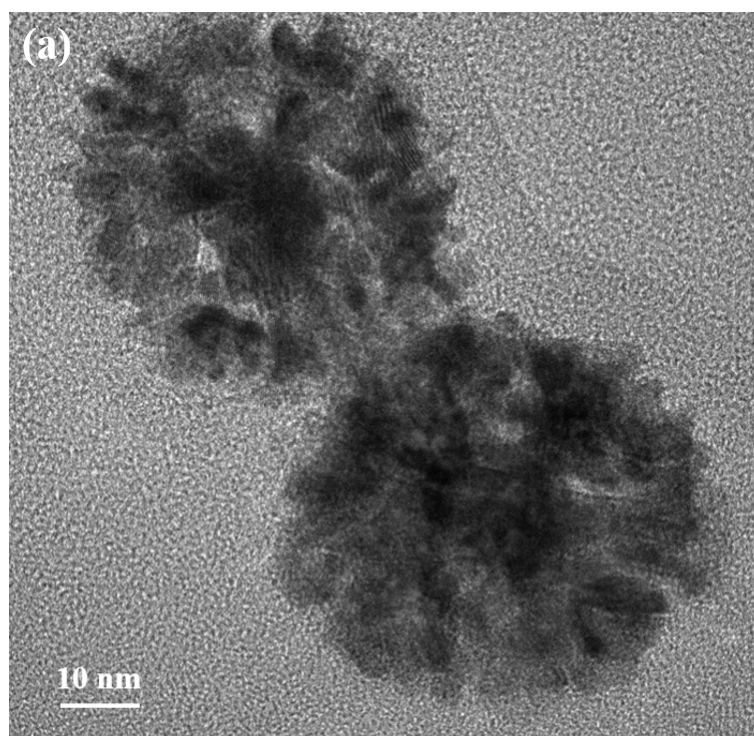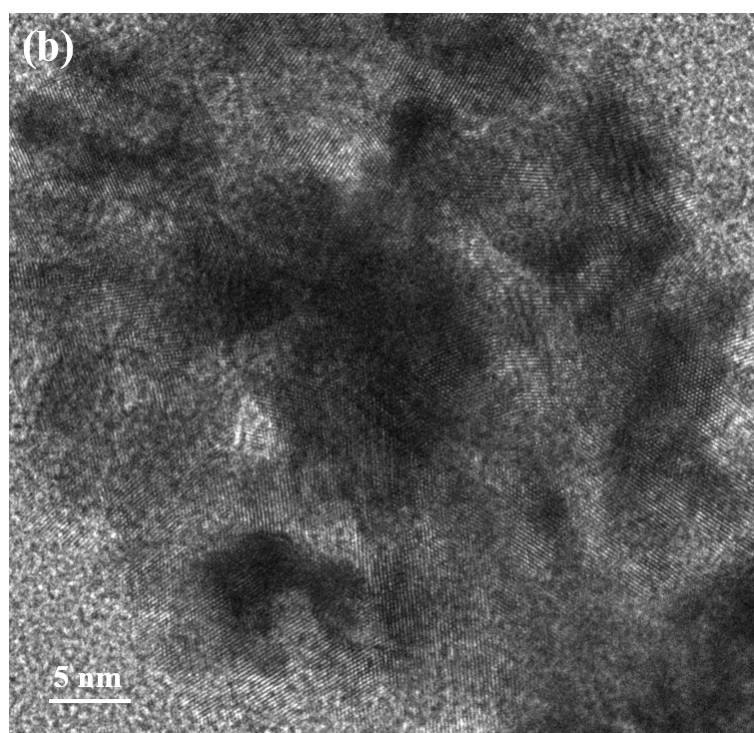

**Fig. S3** High-resolution TEM images of Au@Pd@Pt CSNs with different magnification.

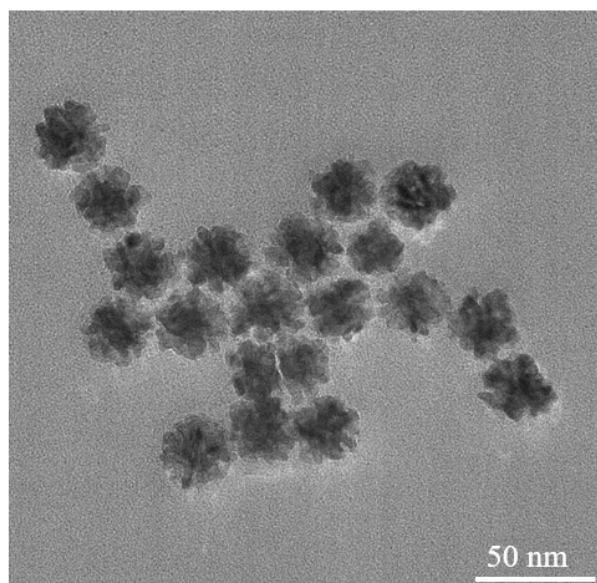

**Fig. S4** TEM image of Au@Pd CSNs.

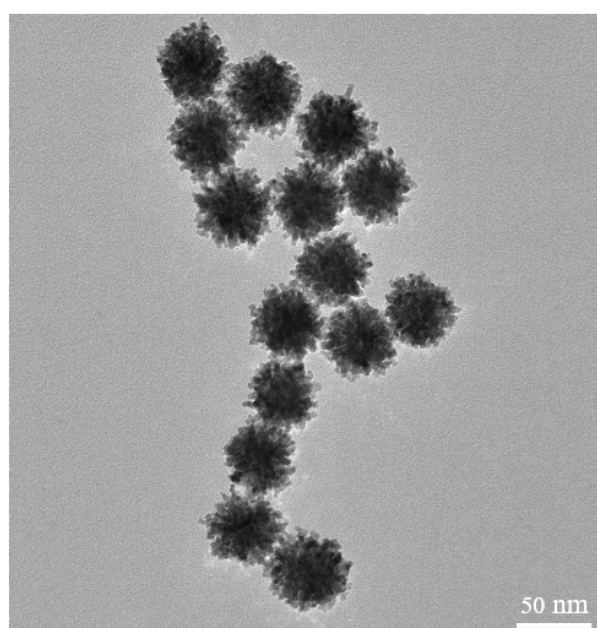

**Fig. S5** TEM image of Au@Pt CSNs.

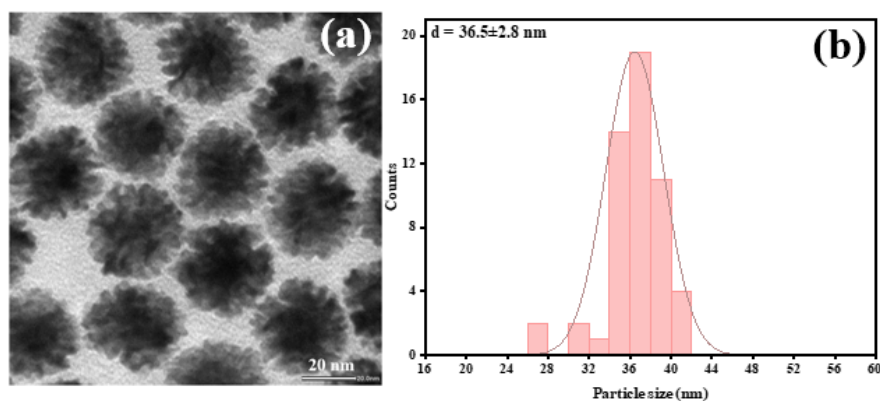

**Fig. S6** (a) TEM image and (b) the corresponding particle size distribution of the Au@Pd@Pt CSNs synthesized with 5 mL of Au seeds.

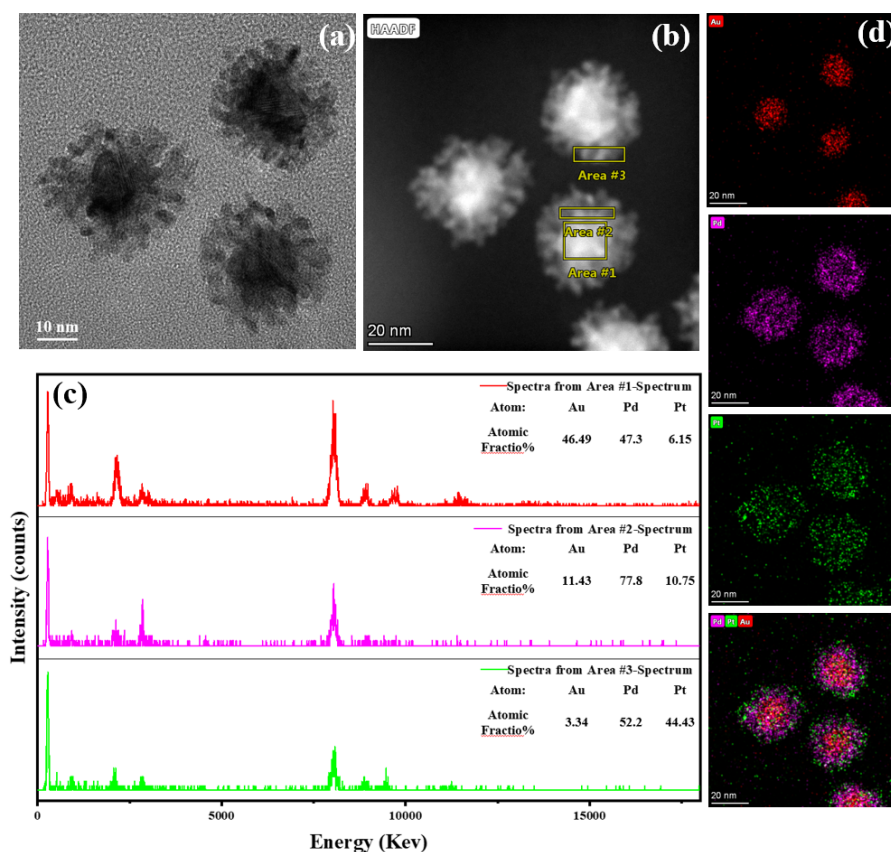

**Fig. S7** Structural and elemental characterization of Au@Pd@Pt (Pd/Pt precursor molar ratio of 1:3) CSNs: (a) TEM image, (b) HAADF-STEM image, (c) EDS quantitative analysis of the selected-area in (b), and (d) EDS elemental mapping images of Au, Pd, Pt, and the composite overlay.

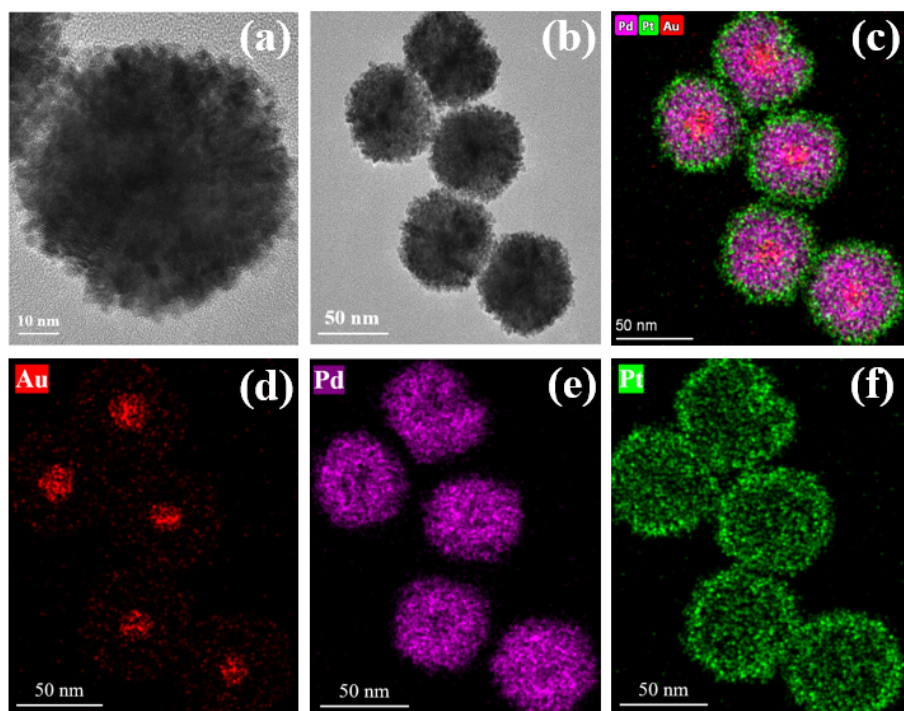

**Fig. S8** (a, b) TEM images and (c-f) EDX elemental mapping of Au@Pd@Pt CSNs synthesized with 200  $\mu\text{L}$  of VC in the absence of CTAC.

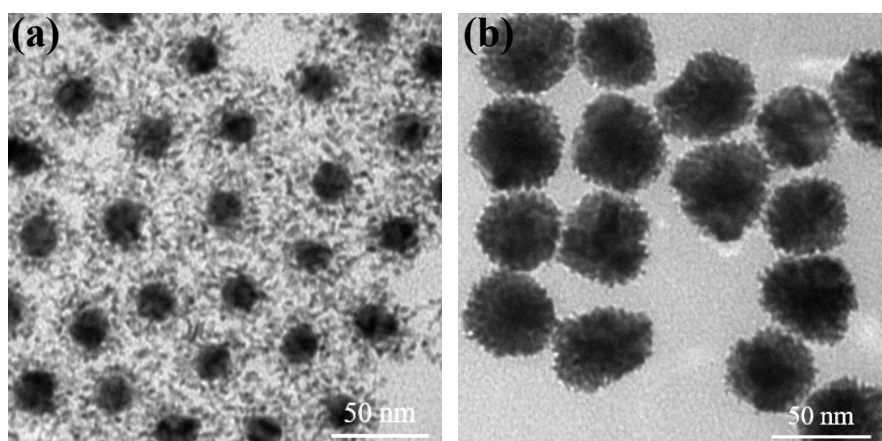

**Fig. S9** TEM images of the samples obtained (a) using sodium ascorbate as the reducing agent ( $\text{pH} = 12.5$ ) and (b) using HCl to adjust the pH to 1.2.



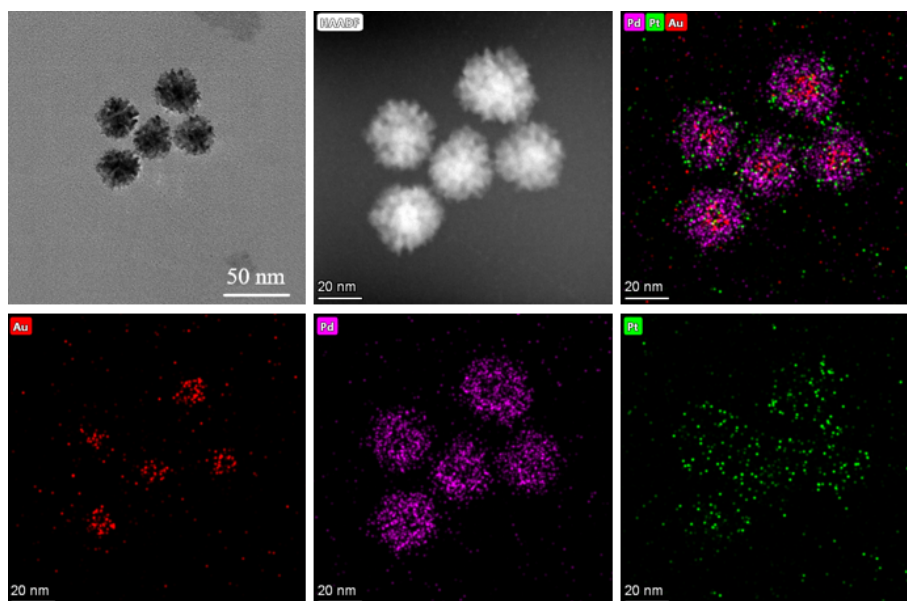

**Fig. S10** TEM, HAADF-STEM, and EDX mapping images of Au@Pd@Pt CSNs obtained via the typical synthesis with different reaction times of 5 min.

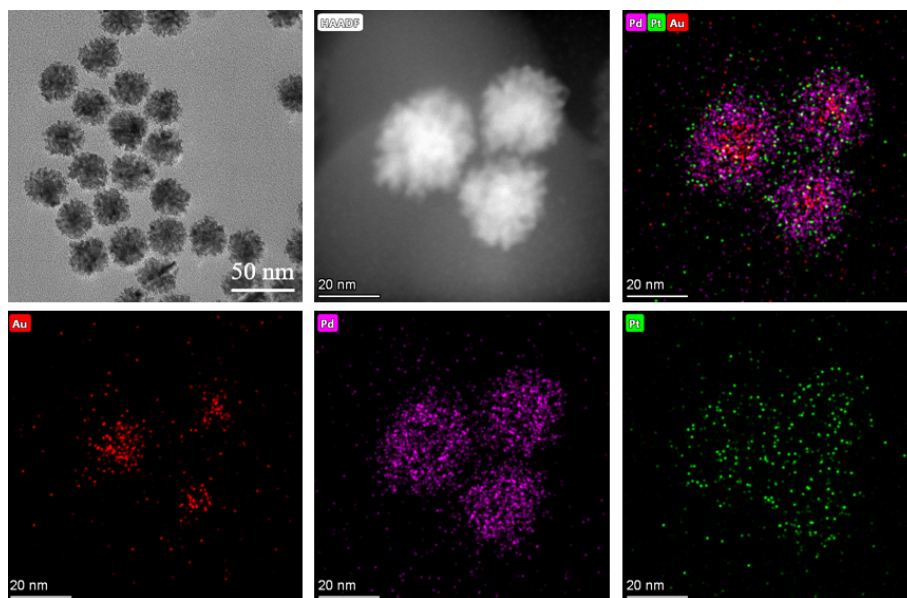

**Fig. S11** TEM, HAADF-STEM, and EDX mapping images of Au@Pd@Pt CSNs obtained via the typical synthesis with different reaction times of 30 min.

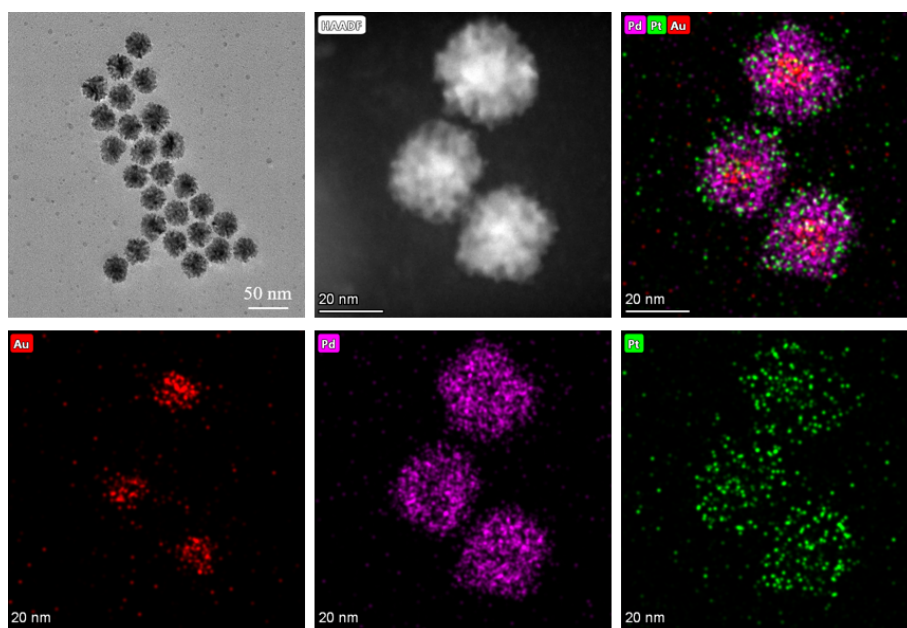

**Fig. S12** TEM, HAADF-STEM, and EDX mapping images of Au@Pd@Pt CSNs obtained via the typical synthesis with different reaction times of 2h.

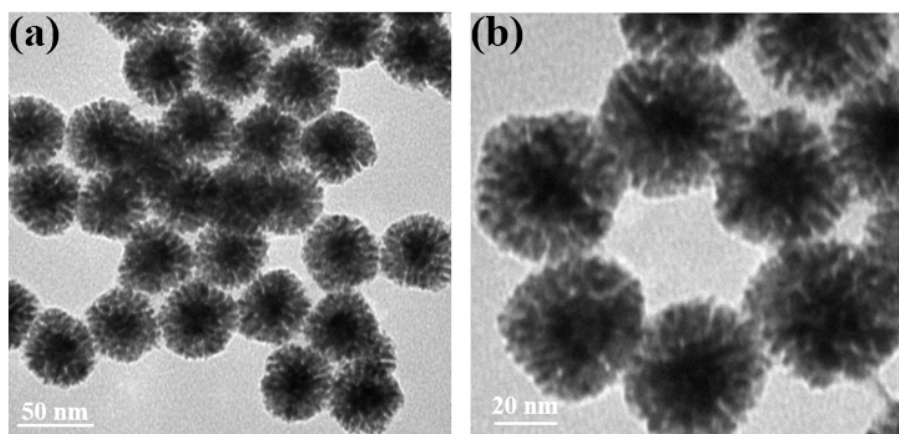

**Fig. S13** (a) Low- and (b) high-magnification TEM images of Au@Pd@Pt CSNs synthesized with 1 mL VC.



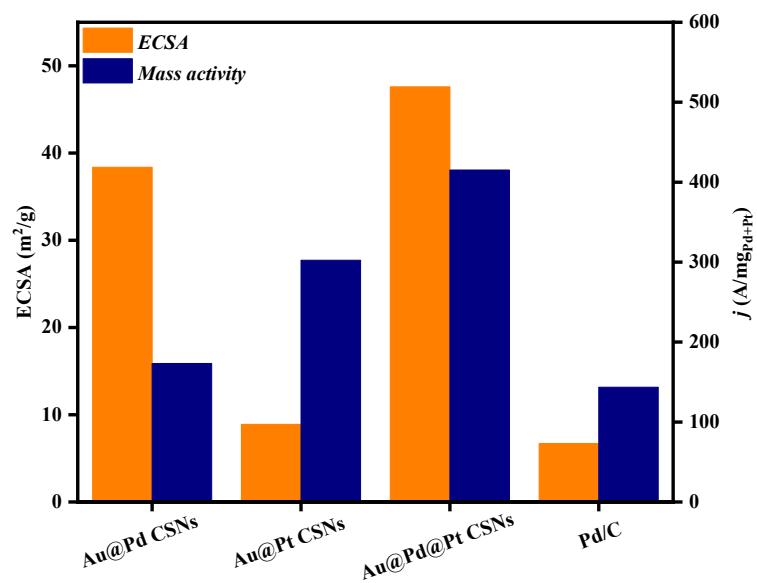

**Fig. S14** Catalyst performance comparison: ECSA and mass activity of Au@Pd@Pt CSNs, Au@Pd CSNs, Au@Pt CSNs, and commercial Pd/C.
